# Supplementary material for: Protein phosphatase 2A activators reverse age‐related behavioral changes by targeting neural cell senescence
Source: PubMed Central journal article supplement (PMC10014060; doi:10.1111/acel.13780), 2023-01-16

**Supplementary Fig. 1**

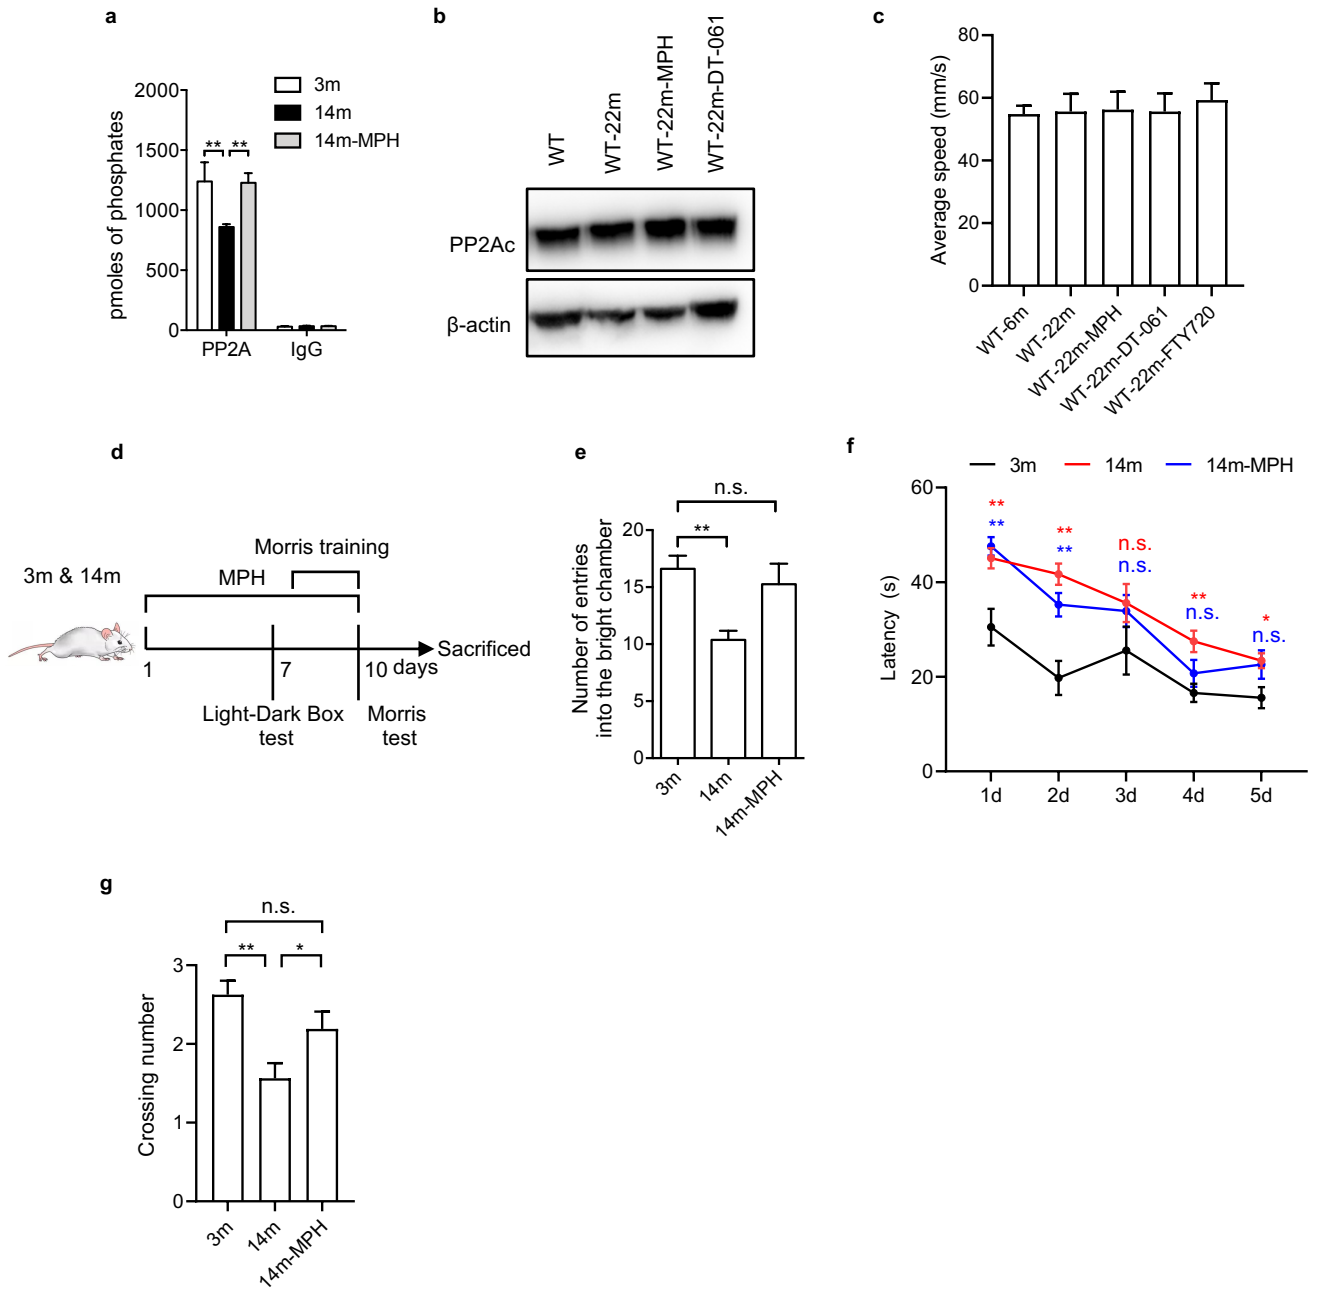

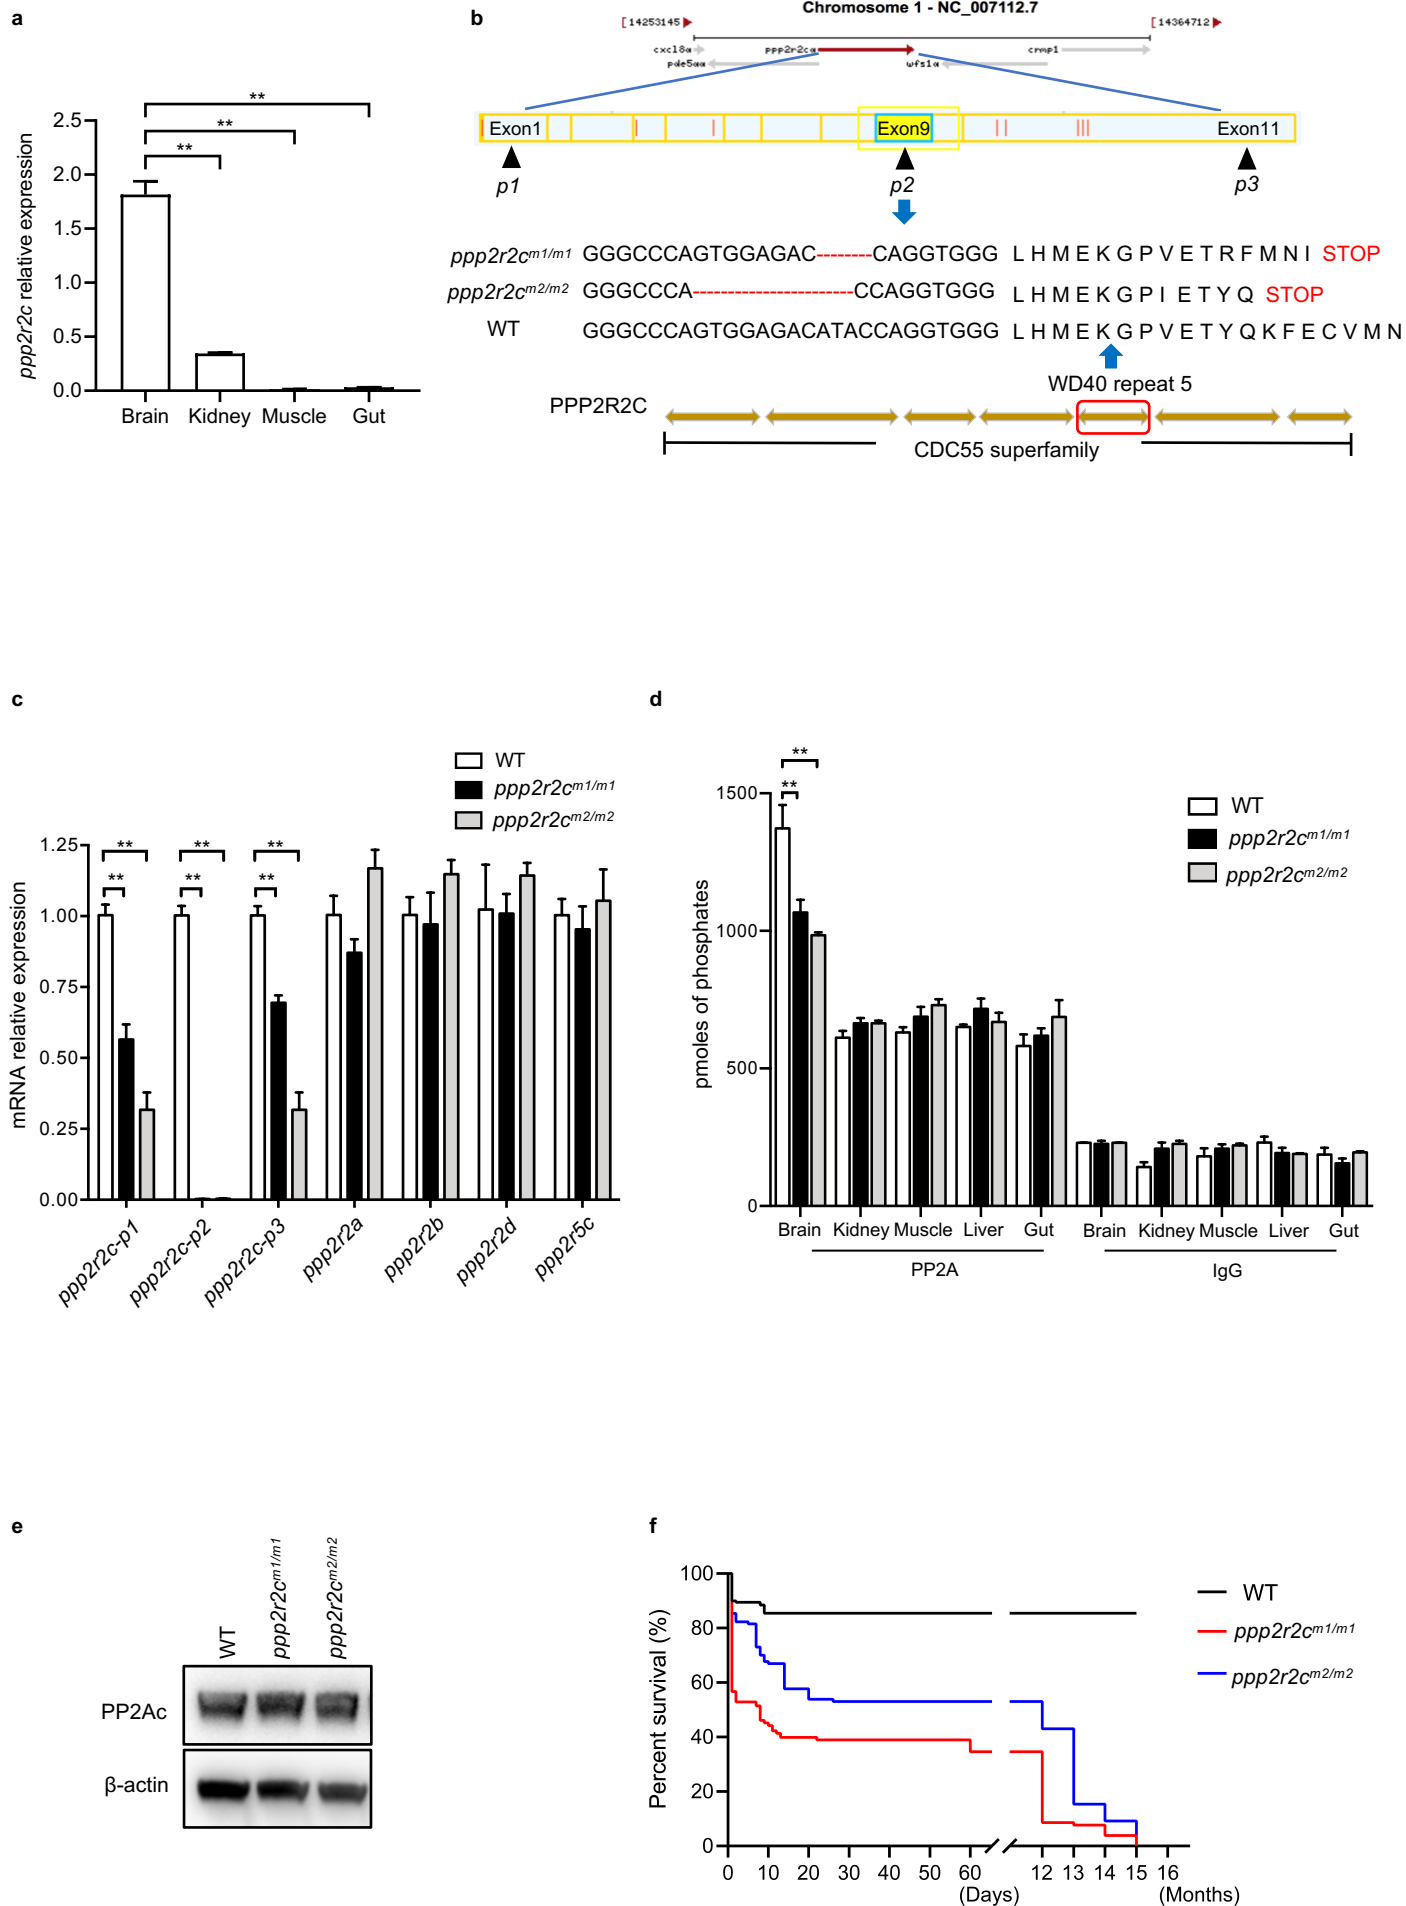

**Supplementary Fig. 3**

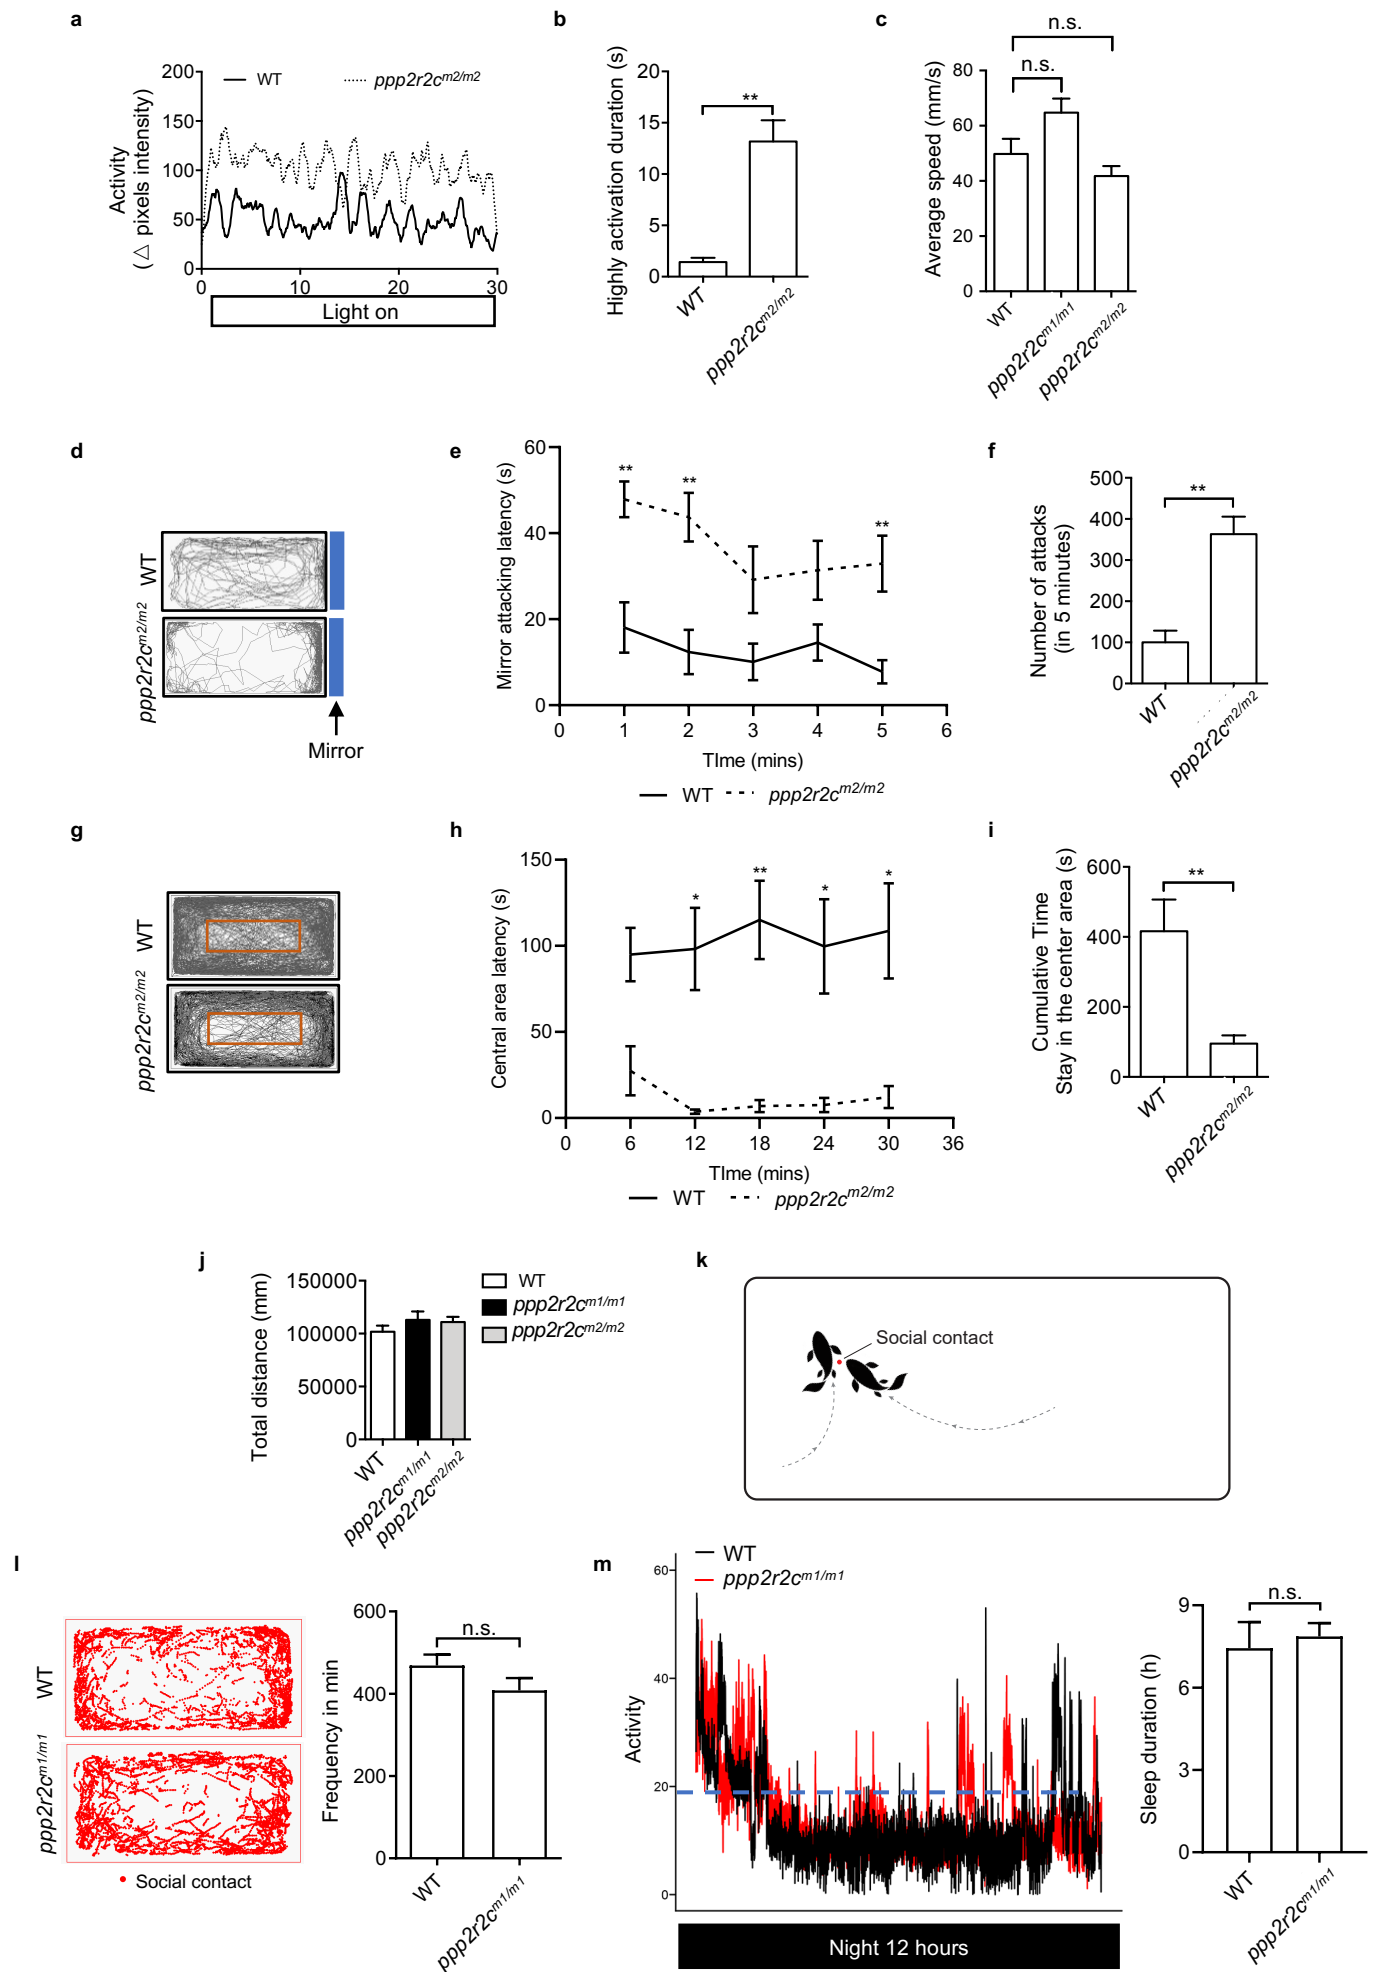

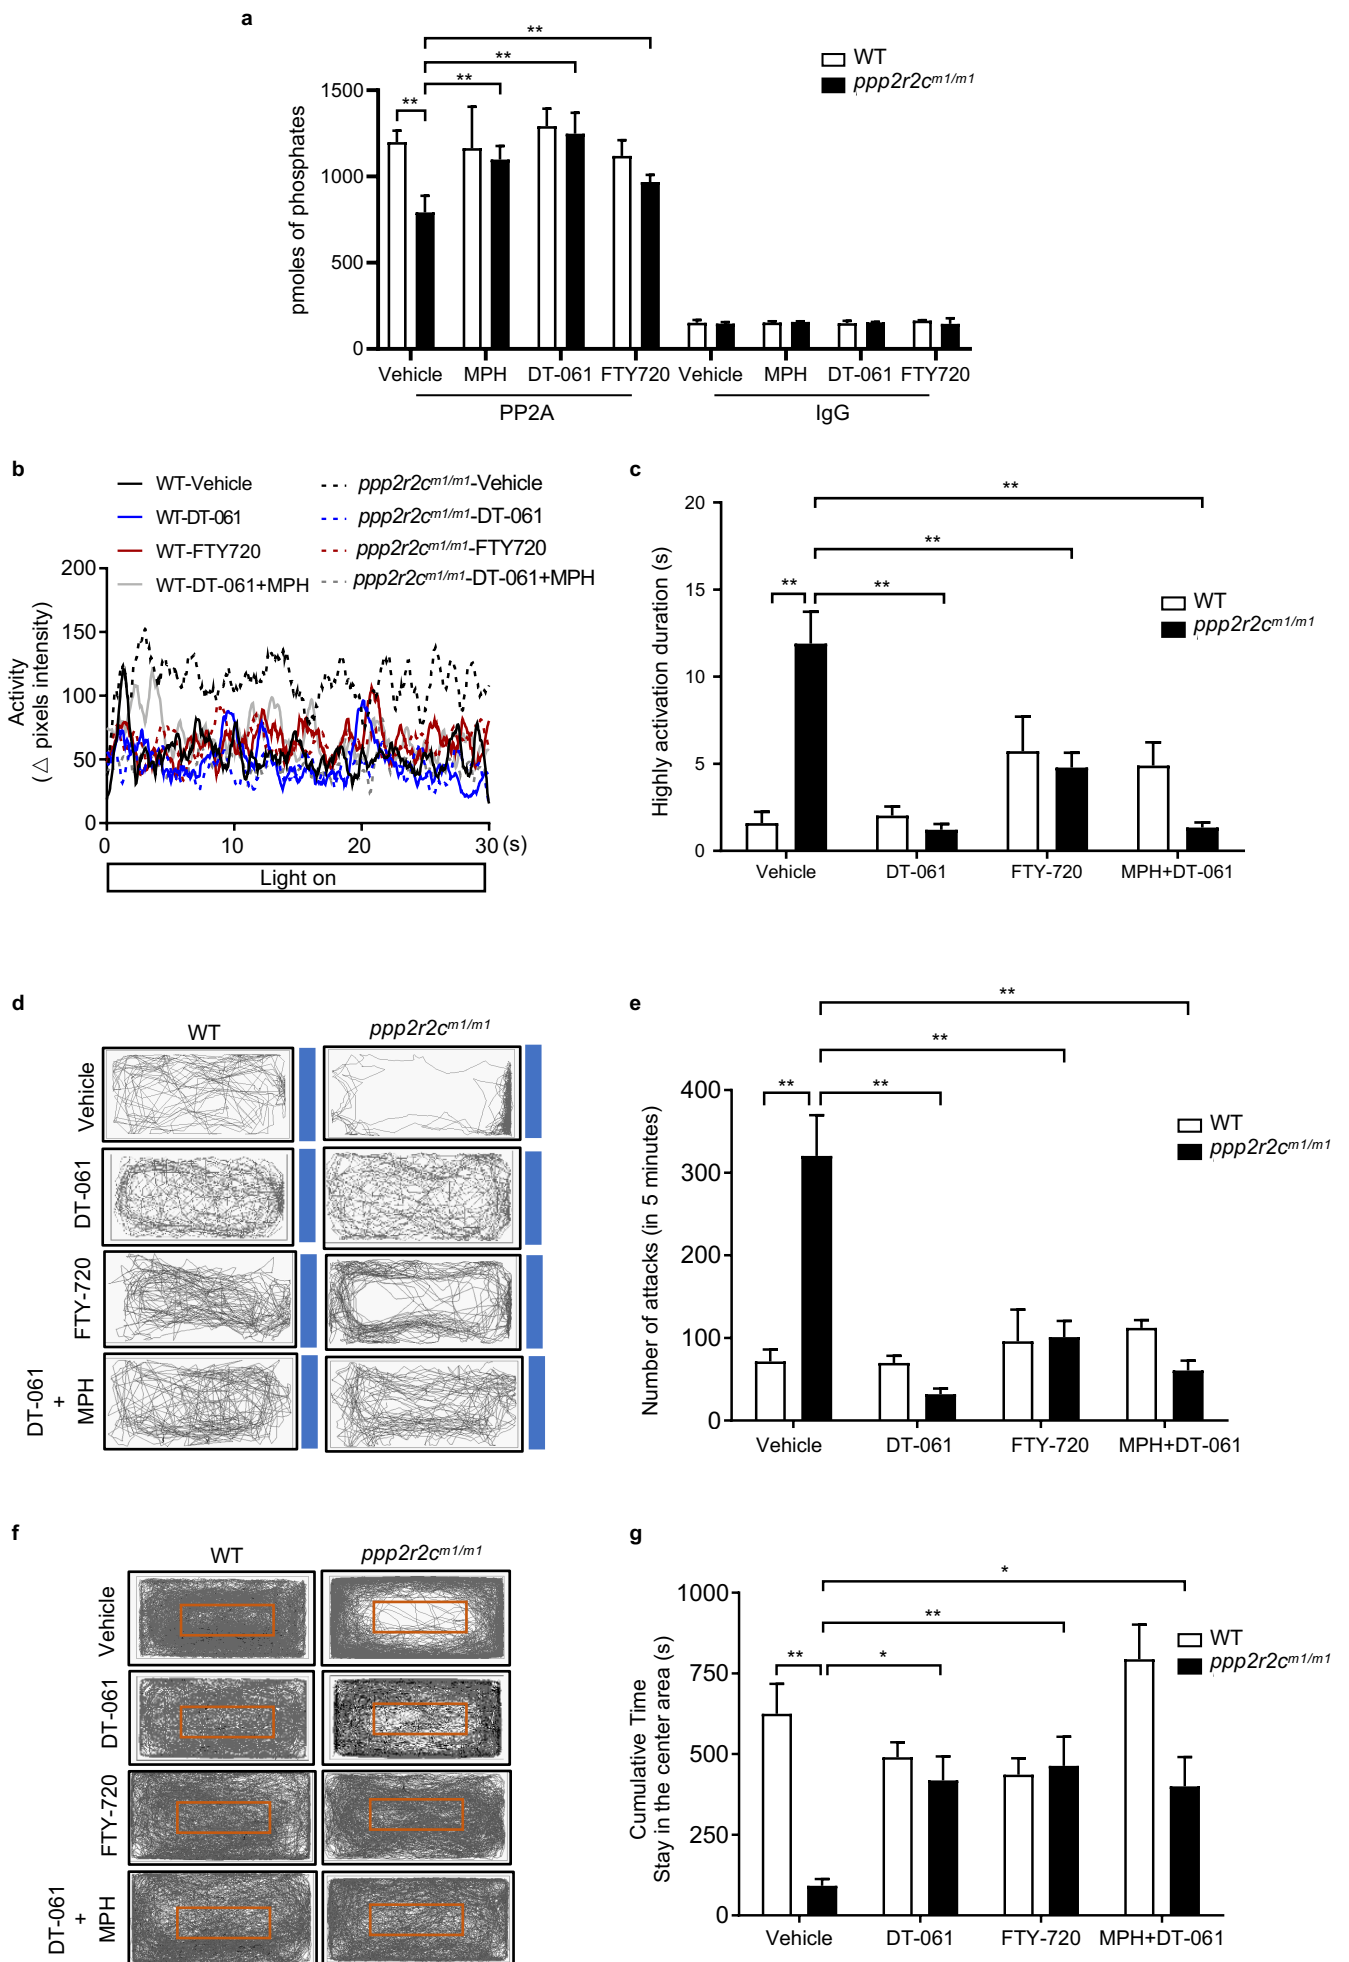

Supplementary Fig. 5

a

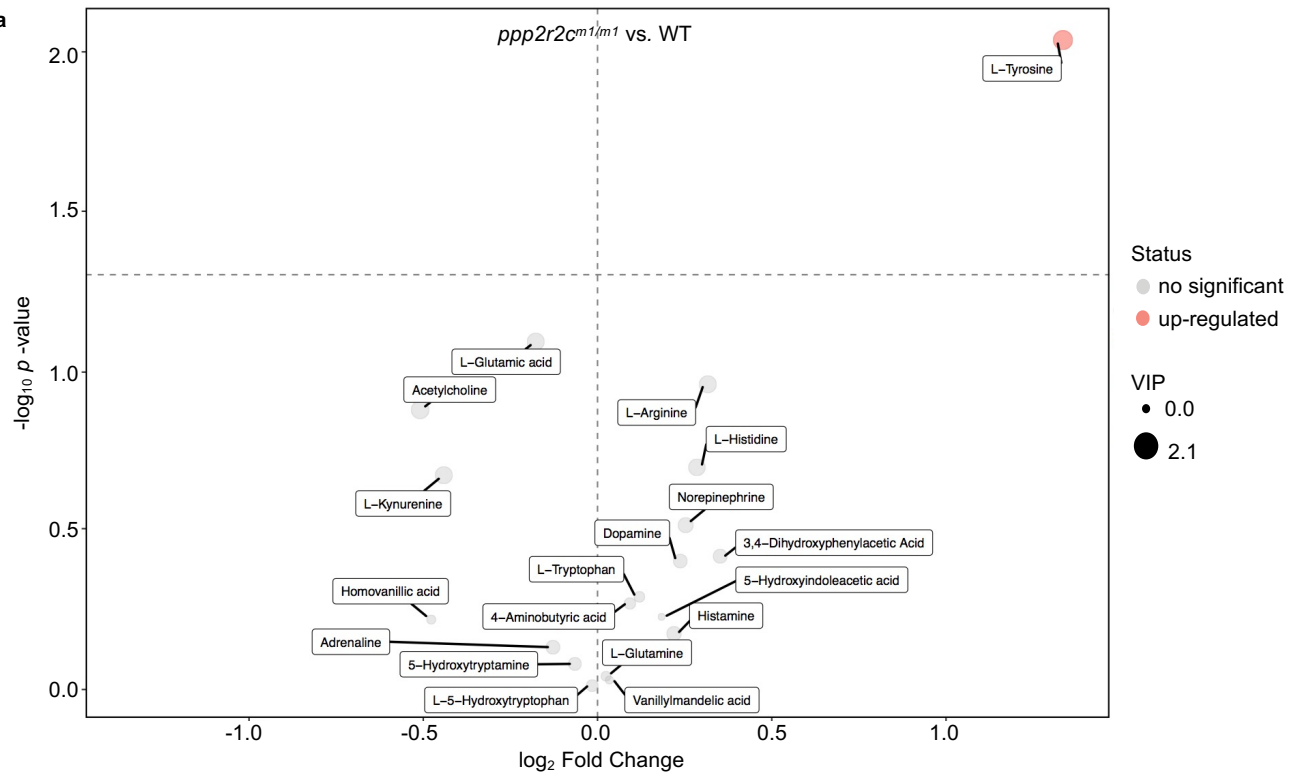

Supplementary Fig. 6

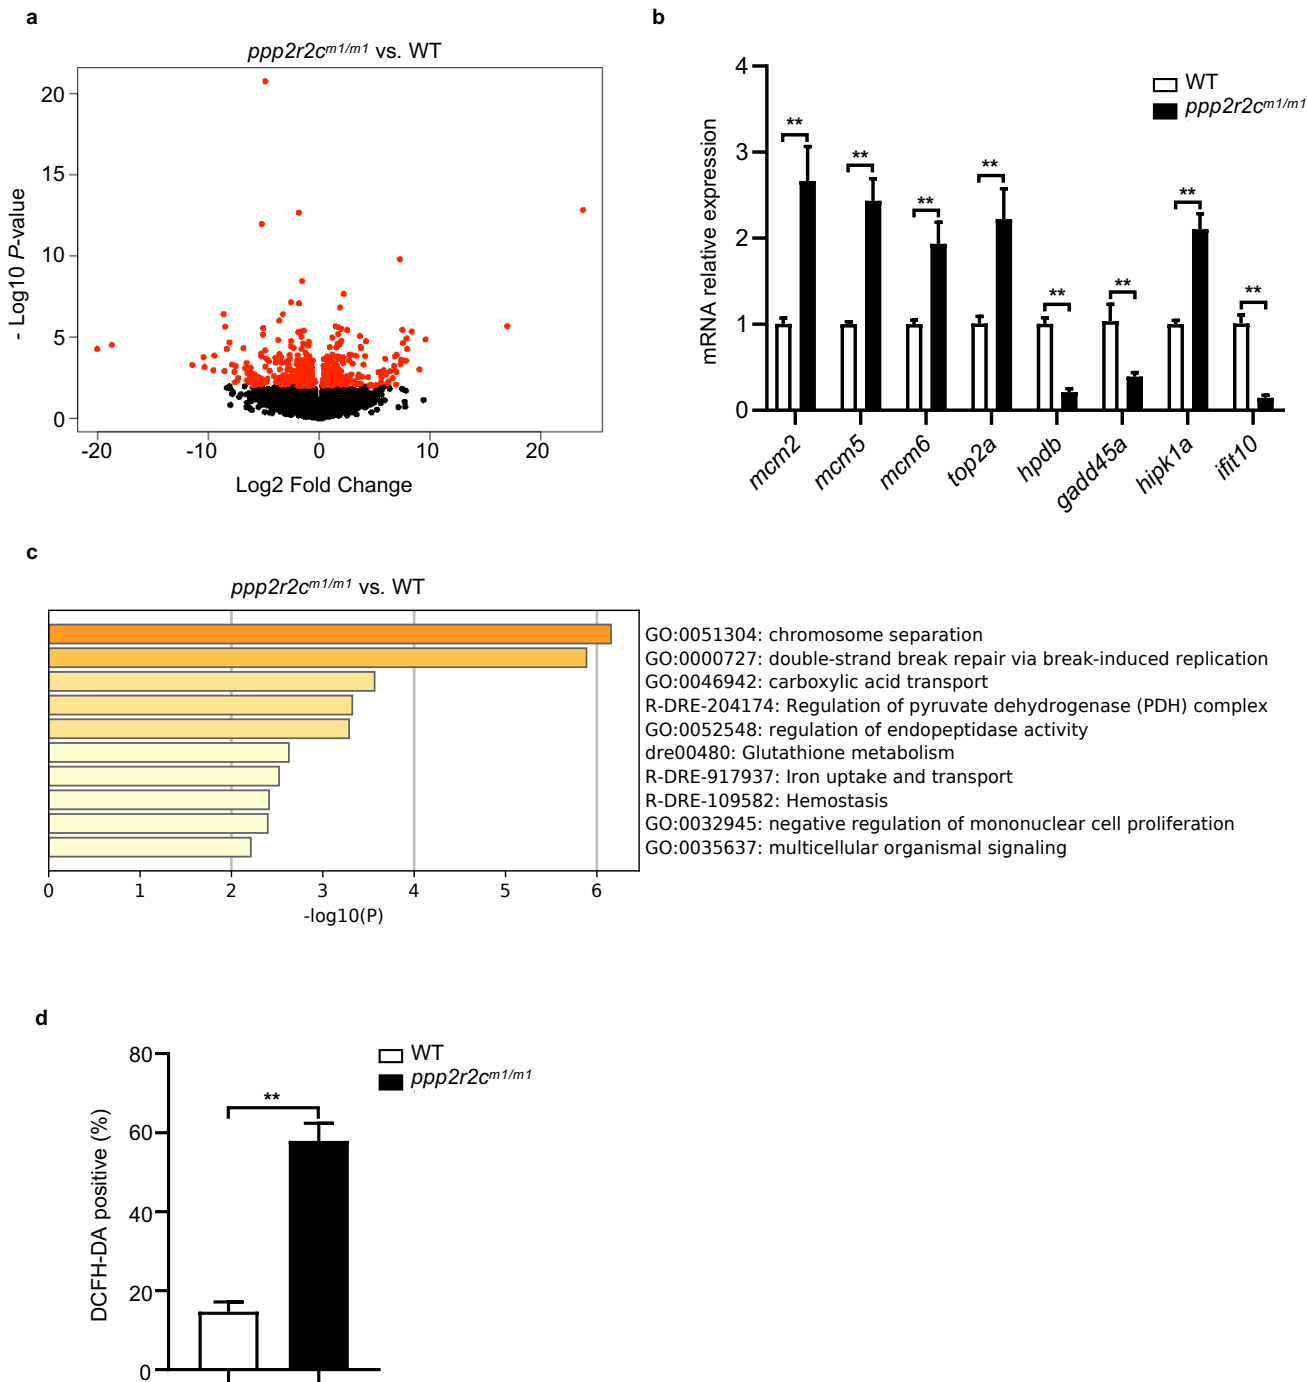

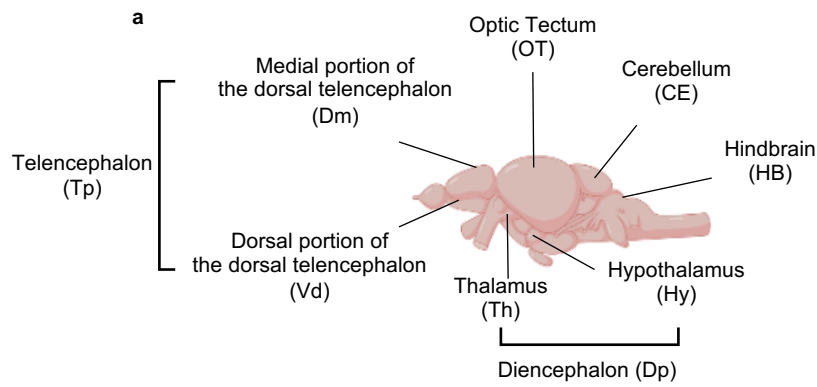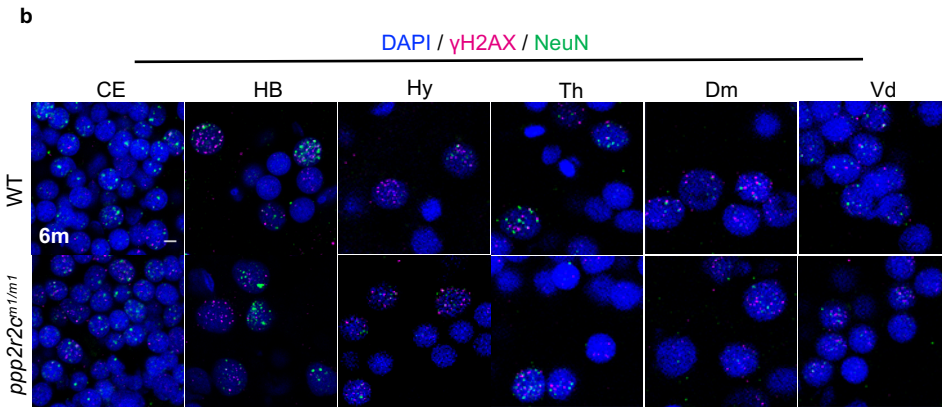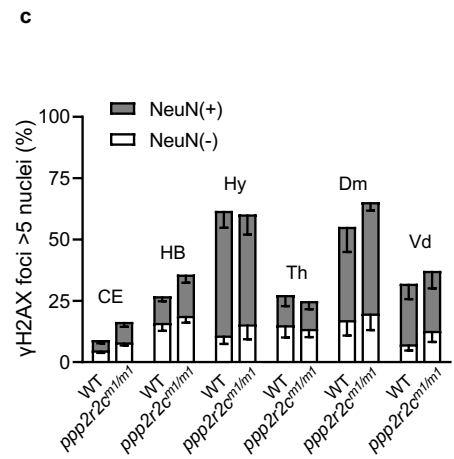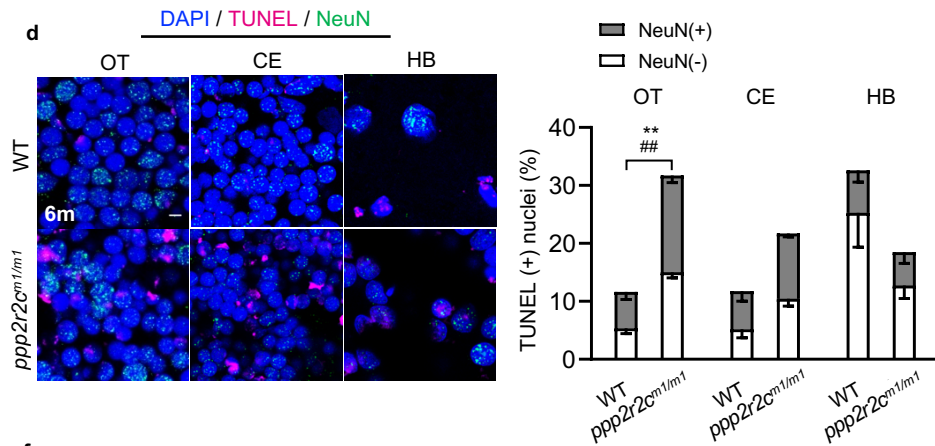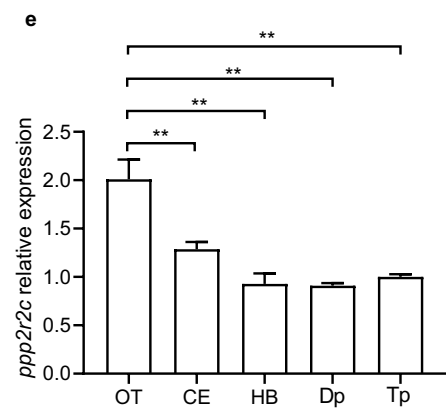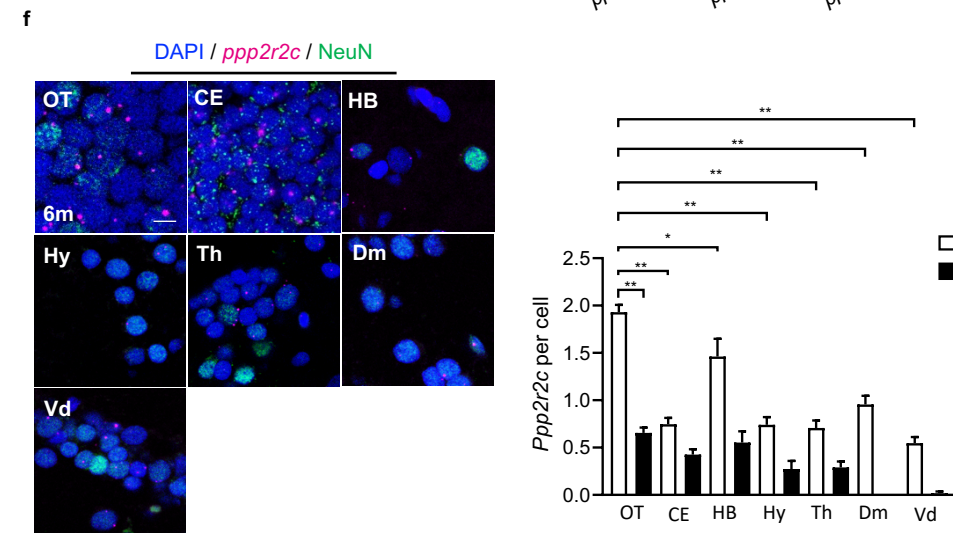

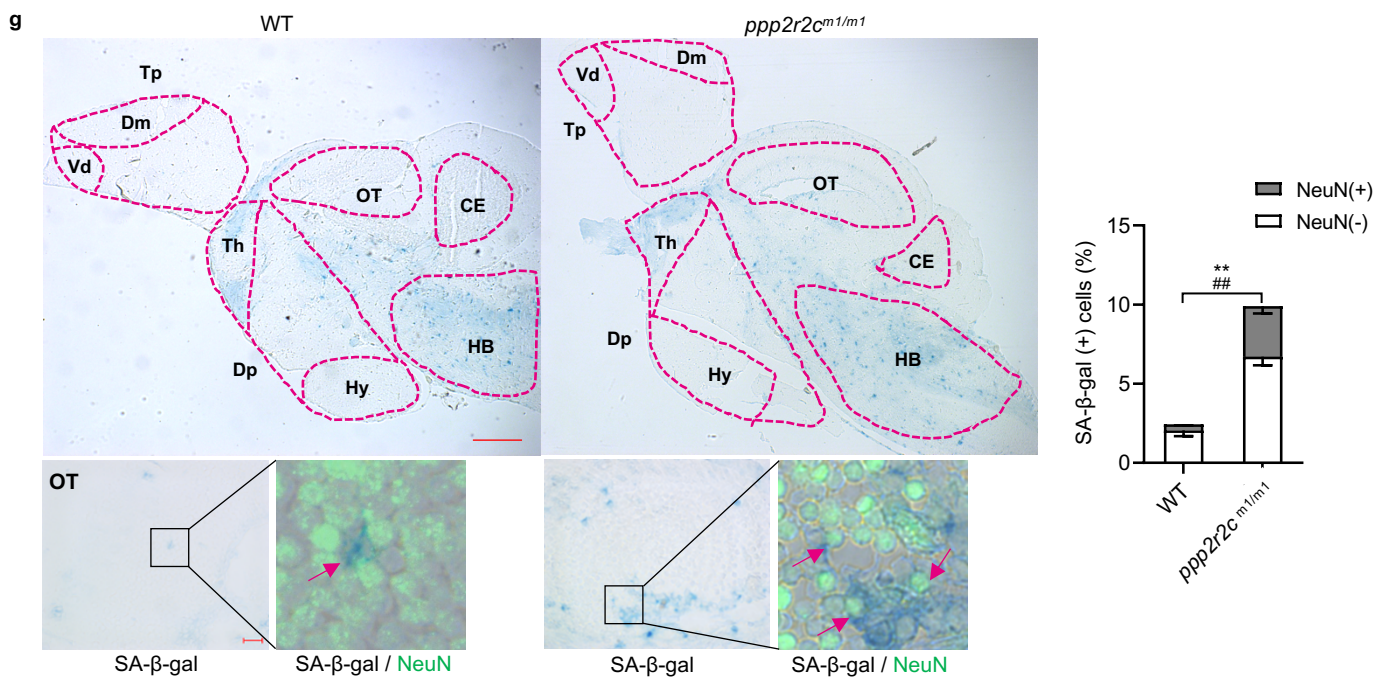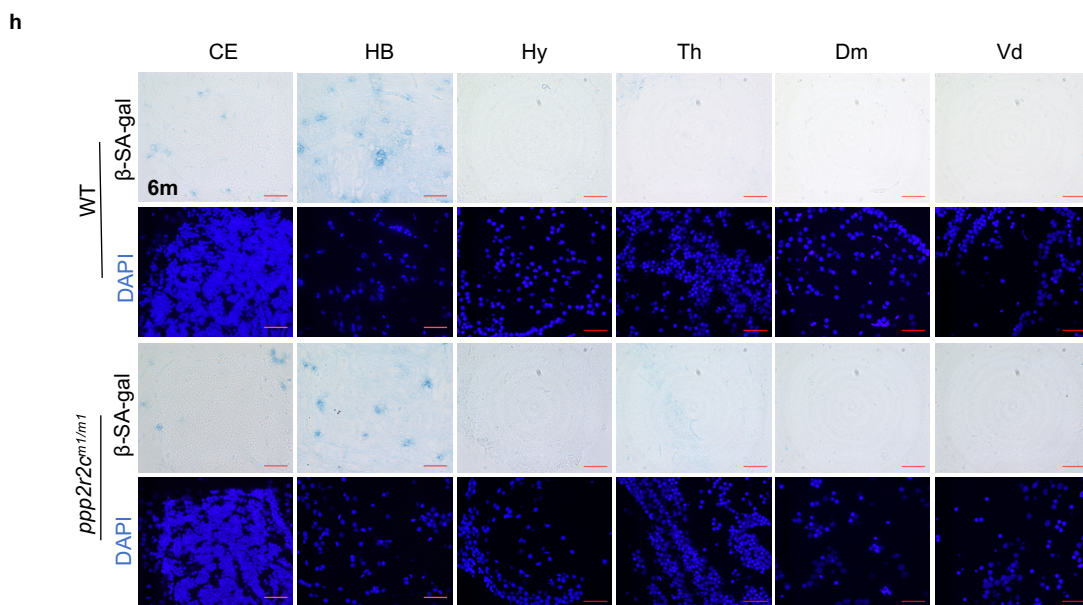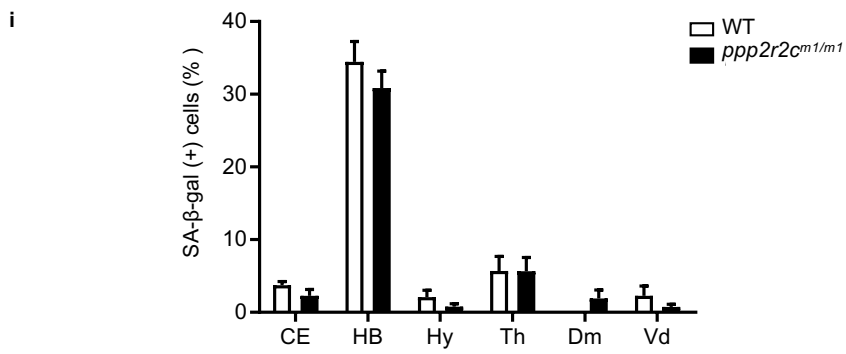



j

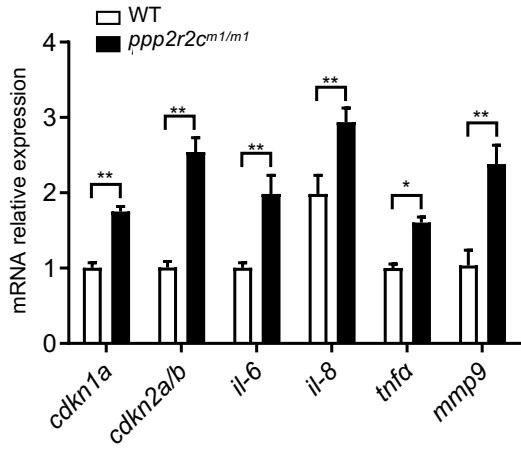

k

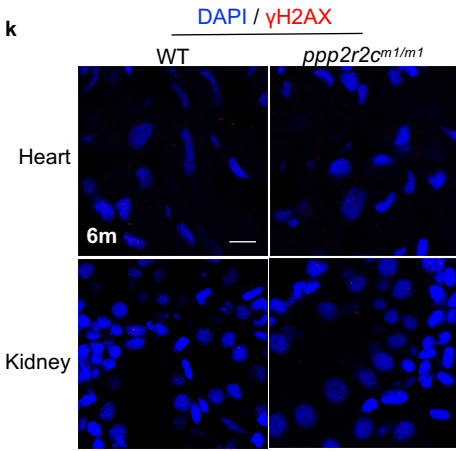

l

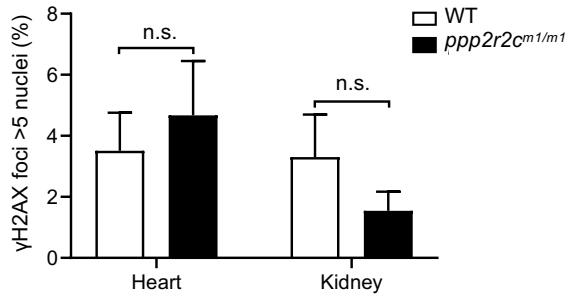

m

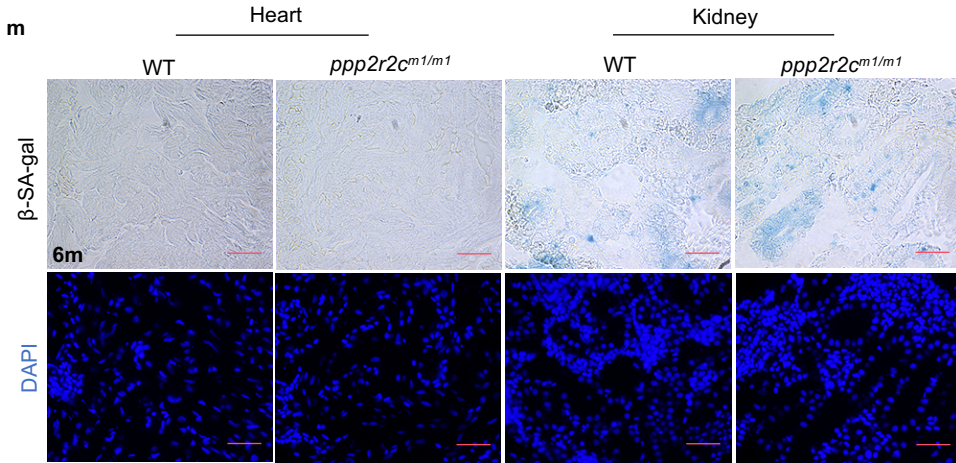

n

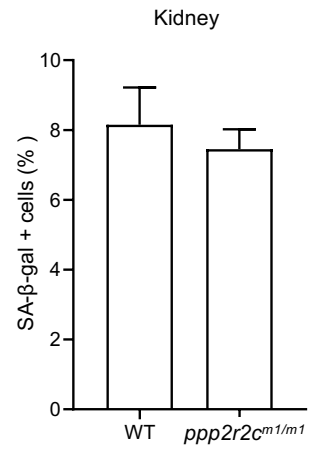

Supplementary Fig. 8

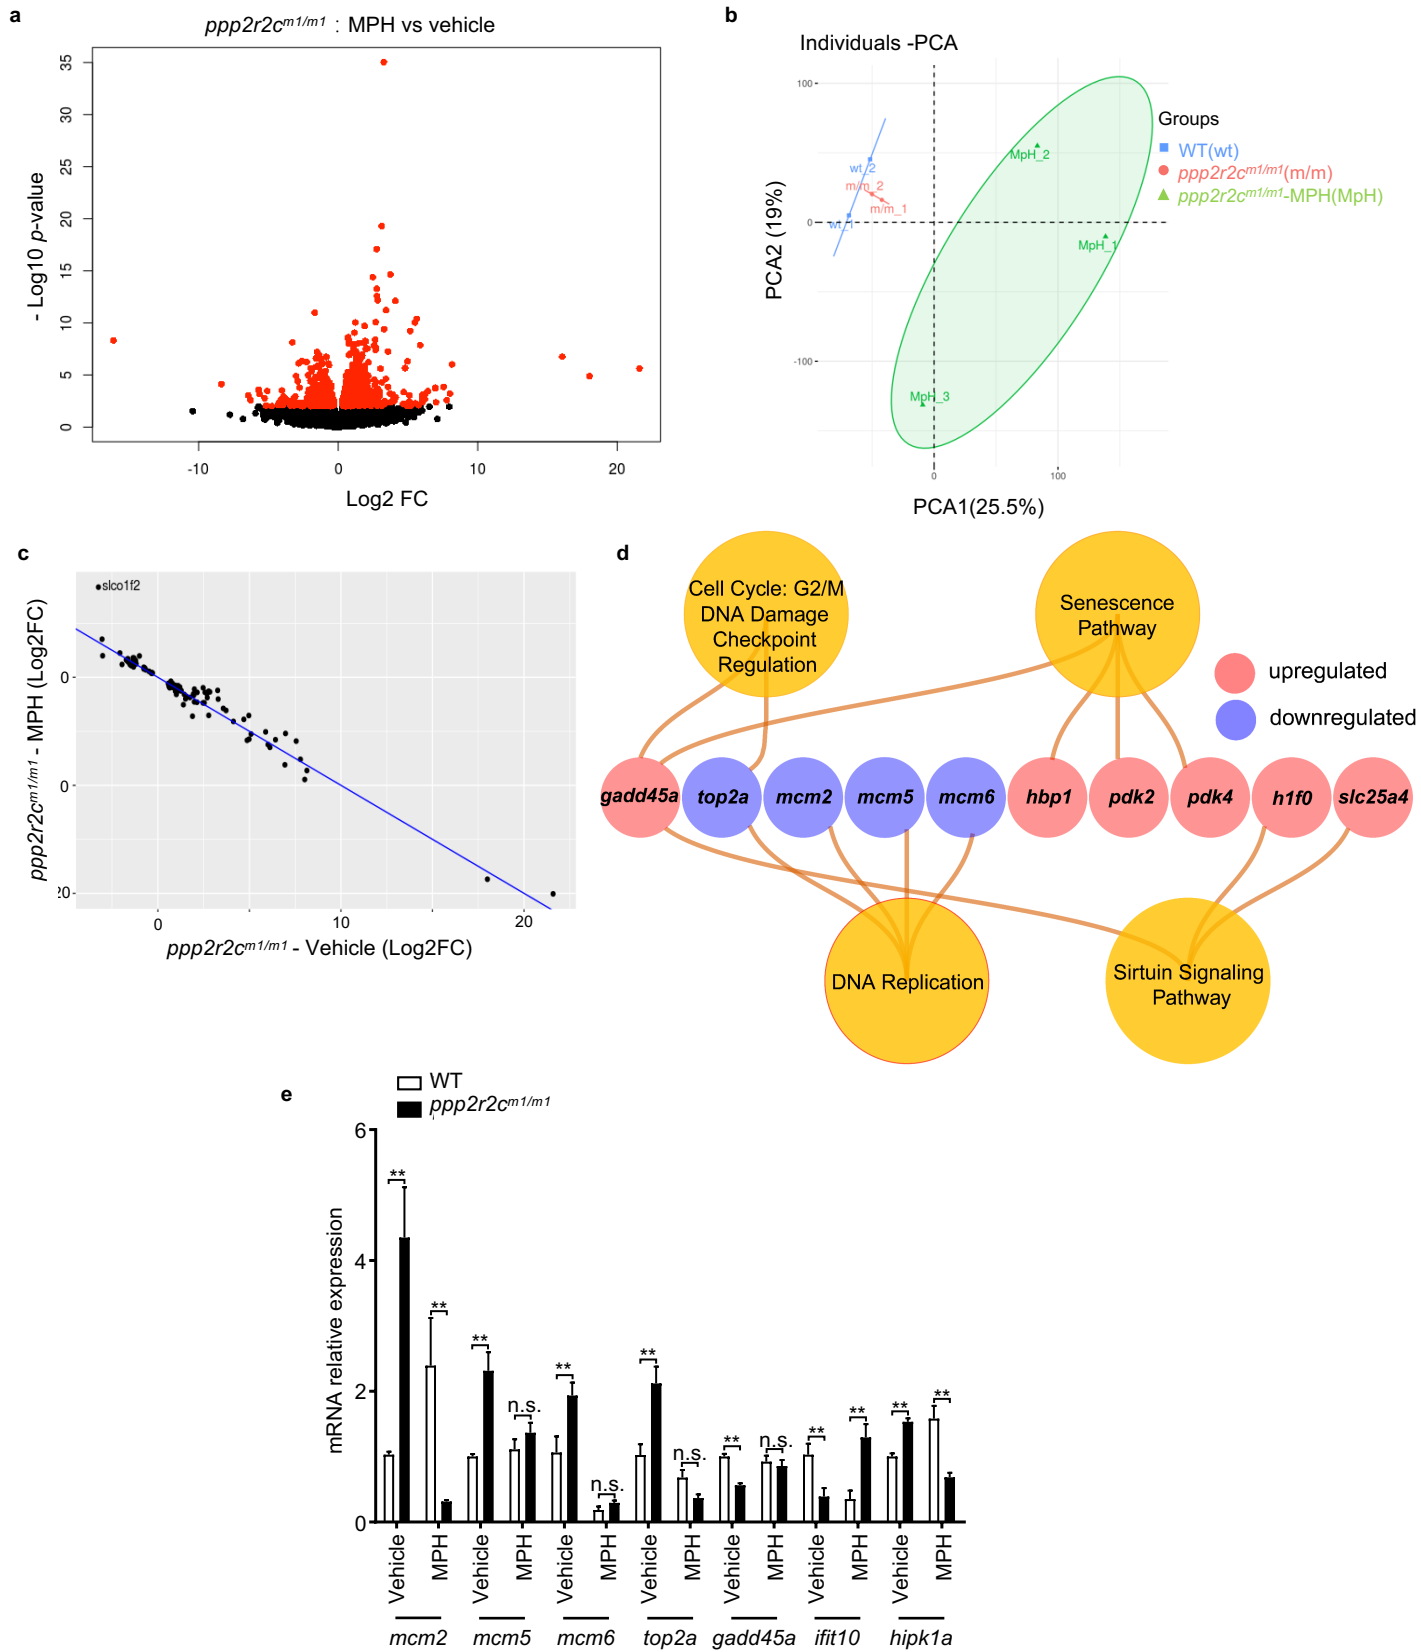

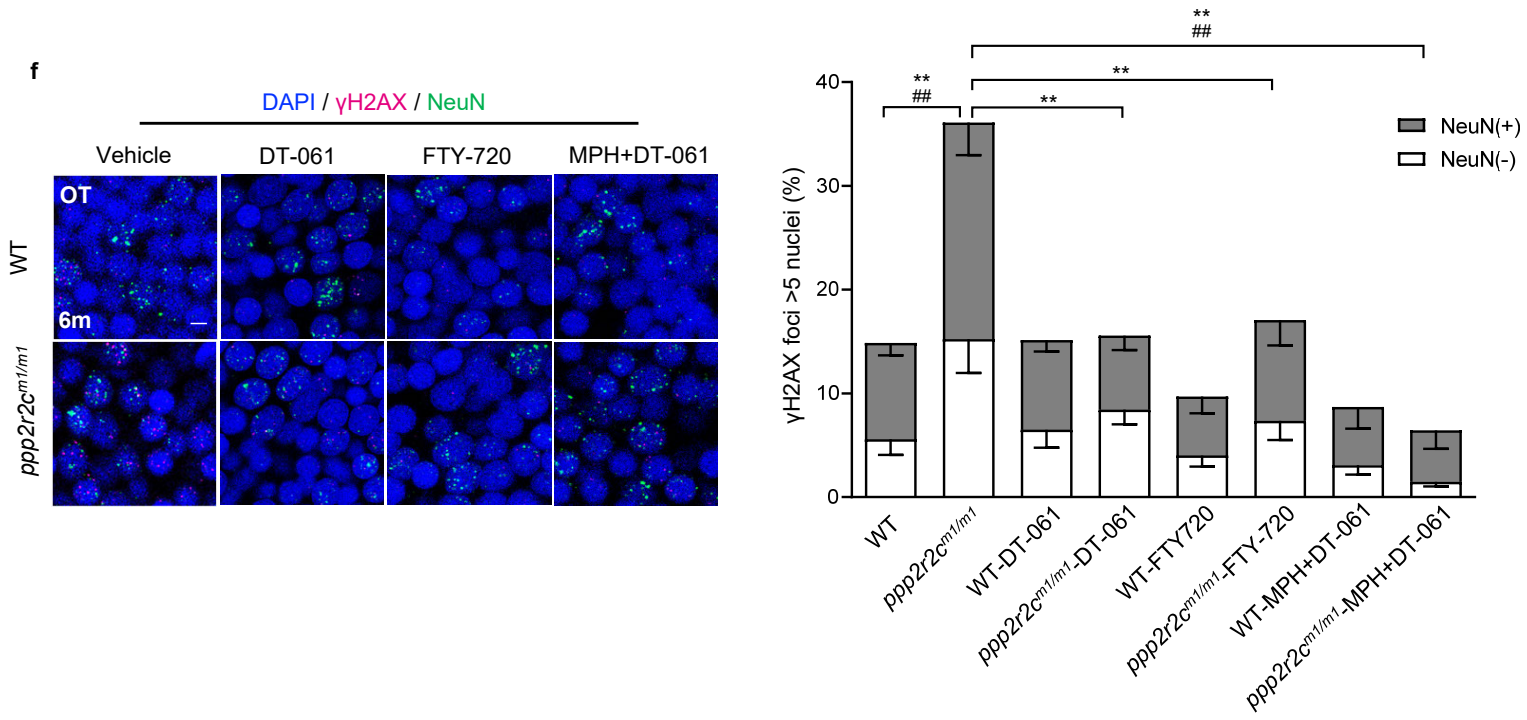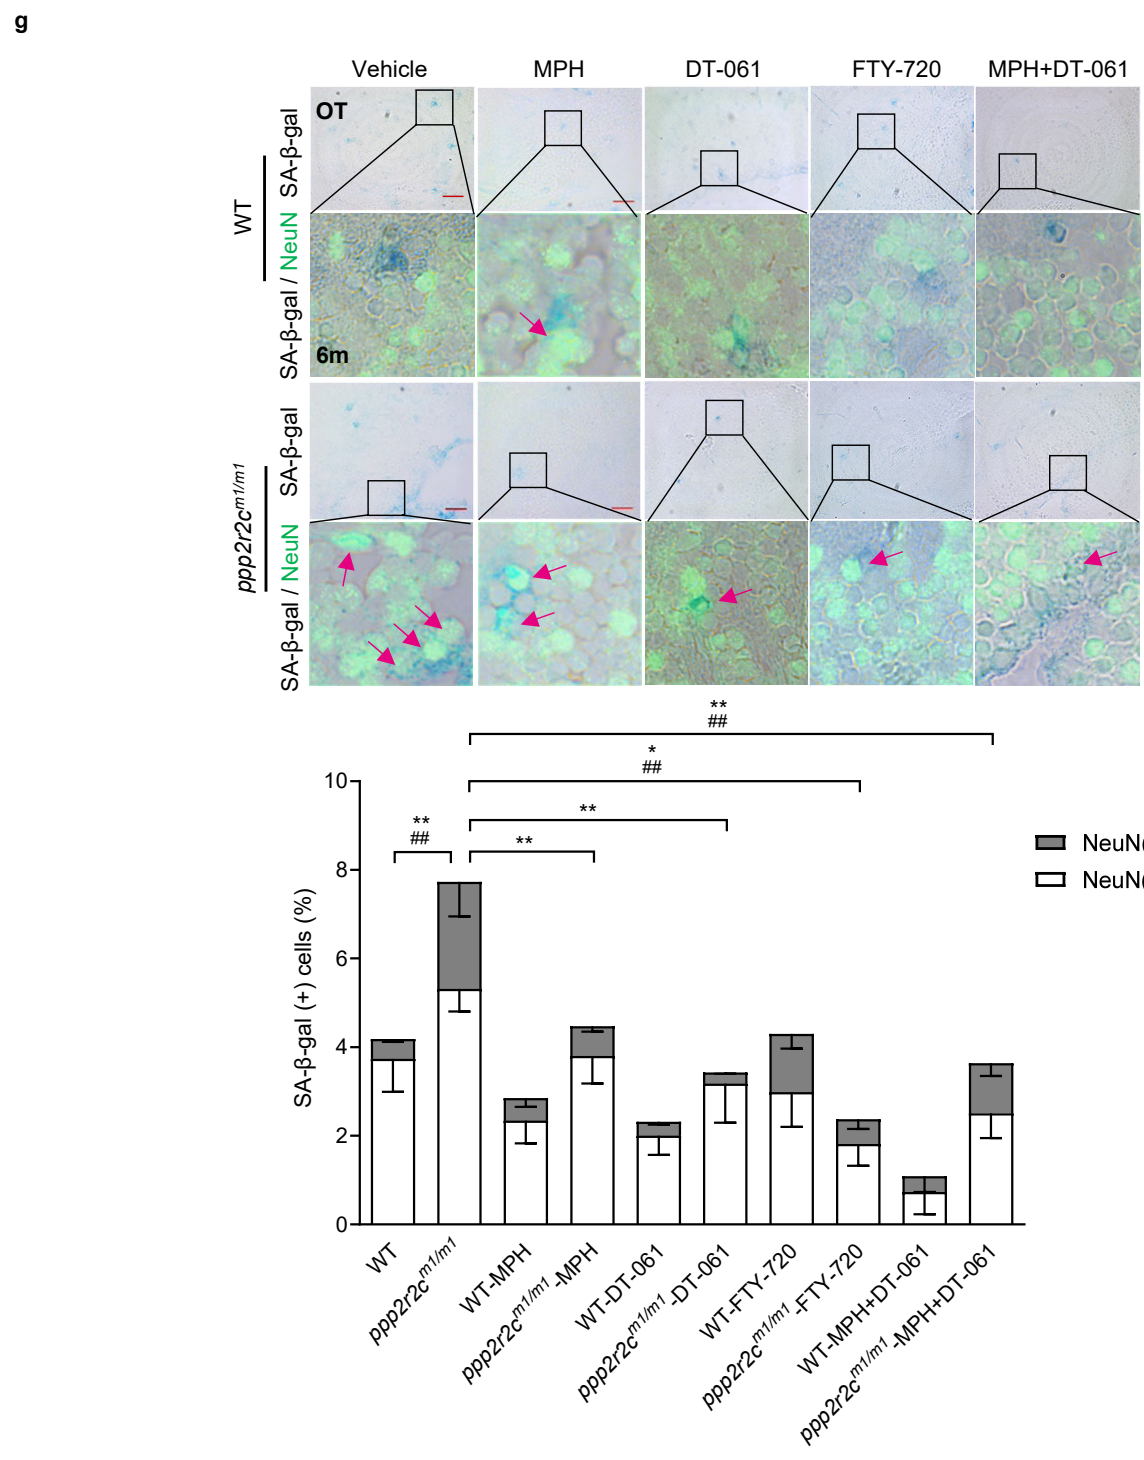

a

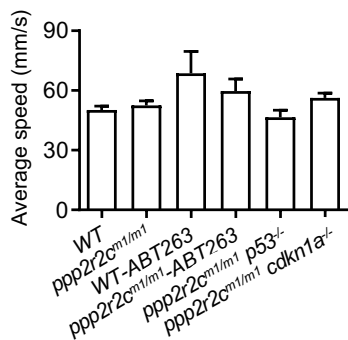

b

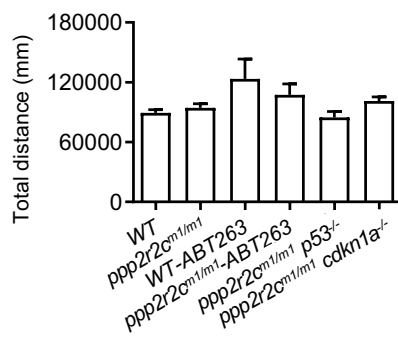

c

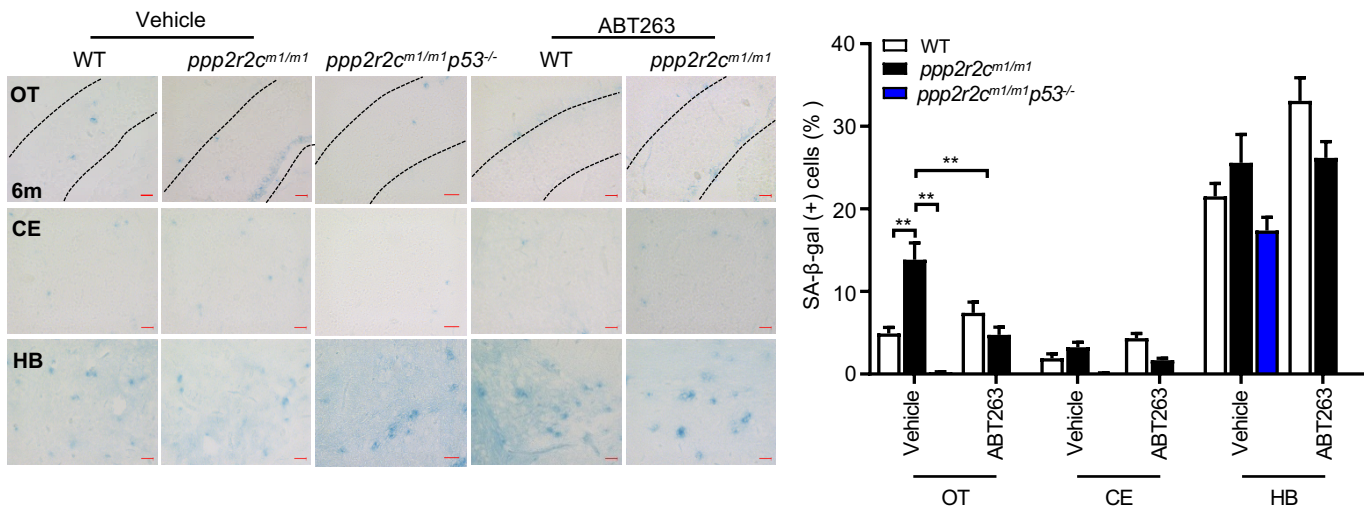

d

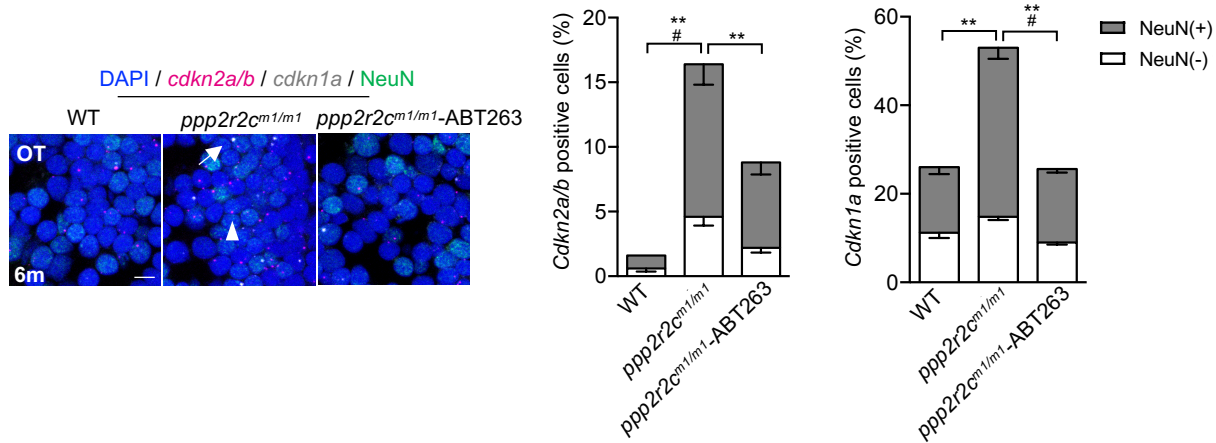

e

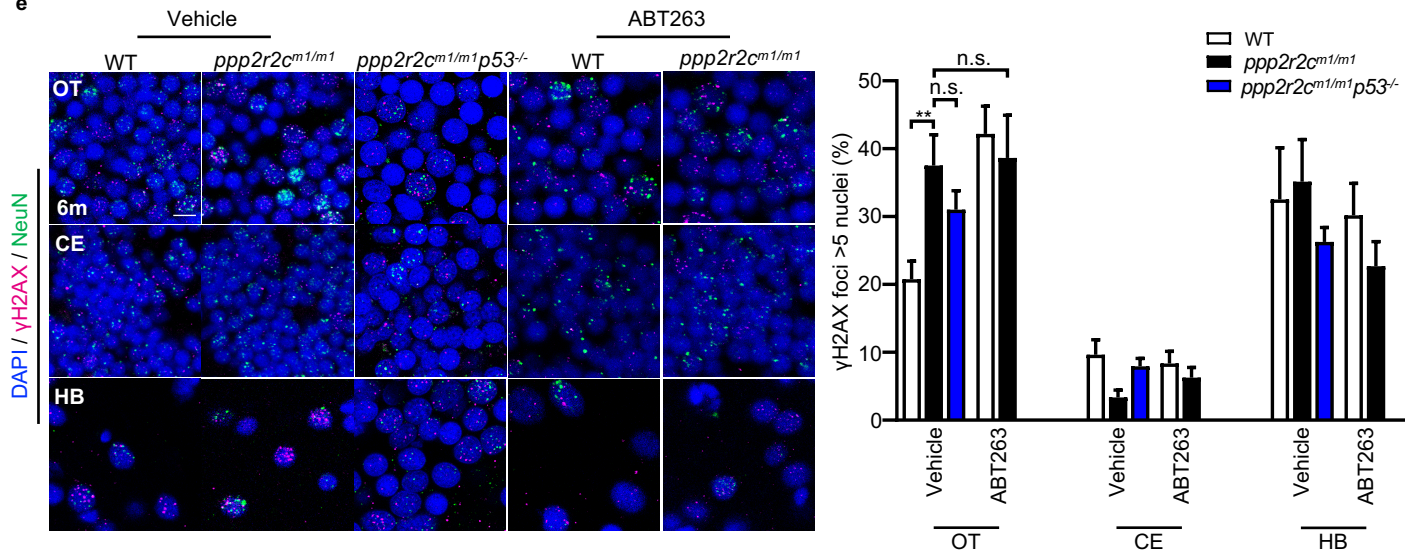

Supplementary Fig. 10

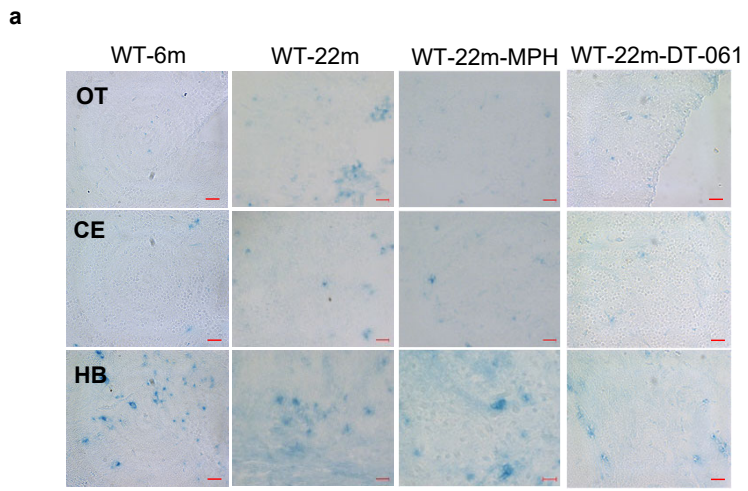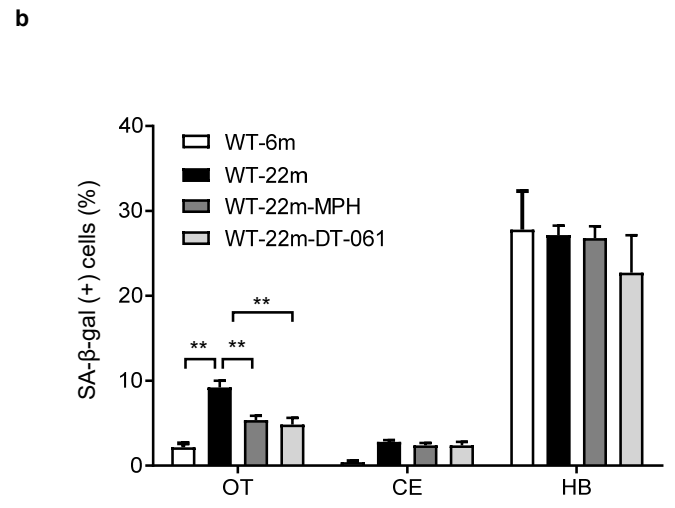

Supplement: ACEL-22-e13780-s006.pdf [file ACEL-22-e13780-s006.pdf]
